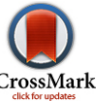

## Correction

# Correction: Microsporidia Detection and Genotyping Study of Human Pathogenic *E. bienersi* in Animals from Spain

## The PLOS ONE Staff

Dr. Javier Millán is not included in the author byline. He should be listed as the seventh author, and his affiliation is 7: Faculty of Ecology and Natural Resources, Universidad Andres Bellow, Santiago, Chile. The contributions of this author are as follows: Contributed reagents/materials/analysis tools.

## Reference

1. Galván-Díaz AL, Magnet A, Fenoy S, Henriques-Gil N, Haro M, et al. (2014) Microsporidia Detection and Genotyping Study of Human Pathogenic *E. bienersi* in Animals from Spain. PLoS ONE 9(3): e92289. doi:10.1371/journal.pone.0092289

---

**Citation:** The PLOS ONE Staff (2014) Correction: Microsporidia Detection and Genotyping Study of Human Pathogenic *E. bienersi* in Animals from Spain. PLoS ONE 9(8): e106017. doi:10.1371/journal.pone.0106017

**Published:** August 12, 2014

**Copyright:** © 2014 The PLOS ONE Staff. This is an open-access article distributed under the terms of the Creative Commons Attribution License, which permits unrestricted use, distribution, and reproduction in any medium, provided the original author and source are credited.
